# Supplementary material
Source: PubMed Central journal article supplement (PMC5115283)
Supplement: ADVS-2-0j-s001.pdf [file ADVS-2-0j-s001.pdf]

## Supporting Information

for *Adv. Sci.*, DOI: 10.1002/advs.201500001

In Vivo Repeatedly Charging Near-Infrared-Emitting  
Mesoporous SiO<sub>2</sub>/ZnGa<sub>2</sub>O<sub>4</sub>:Cr<sup>3+</sup> Persistent Luminescence  
Nanocomposites

*Zhanjun Li, Yuanwei Zhang, Xiang Wu, Xiaoqiong Wu, Rohit  
Maudgal, Hongwu Zhang, and Gang Han\**

## Supporting Information

***In Vivo* Repeatedly Charging Near-Infrared-Emitting Mesoporous SiO<sub>2</sub>/ZnGa<sub>2</sub>O<sub>4</sub>:Cr<sup>3+</sup> Persistent Luminescence Nanocomposites**

Zhanjun Li, Yuanwei Zhang, Xiang Wu, Rohit Maudgal, Gang Han\*

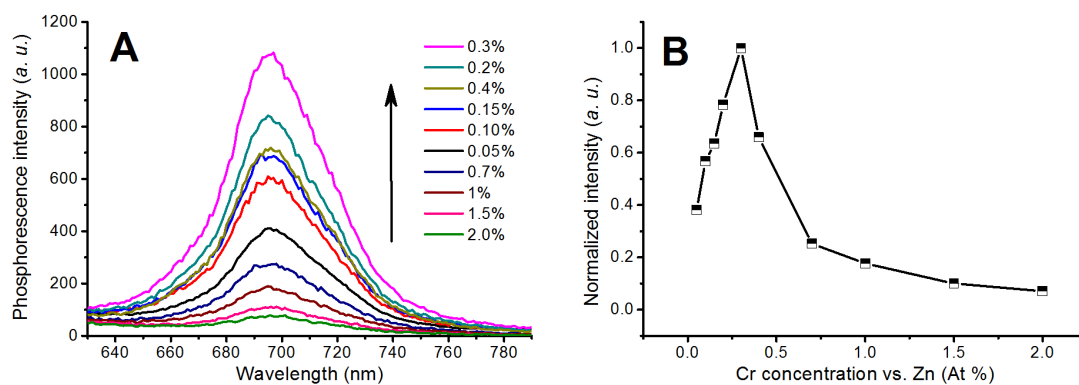

**Figure S1.** Optimization of Cr<sup>3+</sup> doping concentration (vs. Zn) in mZGC.

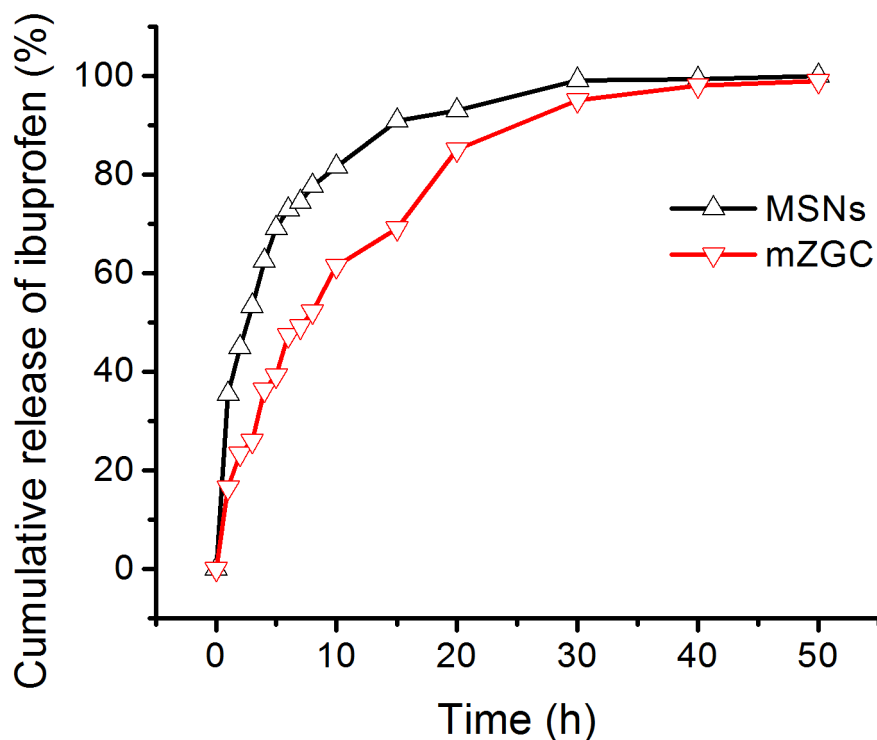

**Figure S2.** Ibuprofen storage/release properties of mZGC. The ibuprofen storage and release experiment was performed according to a previous report.<sup>[1]</sup> Briefly, 60 mg of the MSNs/ $\text{ZnGa}_2\text{O}_4:\text{Cr}^{3+}$  were immersed into 1 mL of 20 mg/L ibuprofen cyclohexane solution for 24 h. Excess ibuprofen cyclohexane solution was removed by centrifugation and decantation. The cyclohexane in the mesoporous silica was evaporated in a 50 °C air dryer for 1 h. The *in vitro* release of ibuprofen was performed by immersing 60 mg of the drug loaded mZGC in 60 mL of simulated body fluid at 37 °C. 100  $\mu\text{L}$  of the mixed solution was taken to test the released amount of ibuprofen at fixed time intervals; this was centrifuged to determine the released ibuprofen in the supernatant by detecting the absorbance. The initial content of ibuprofen on MSNs and mZGC is 146.3 mg/g and 103.9 mg/g respectively, by elemental analysis.

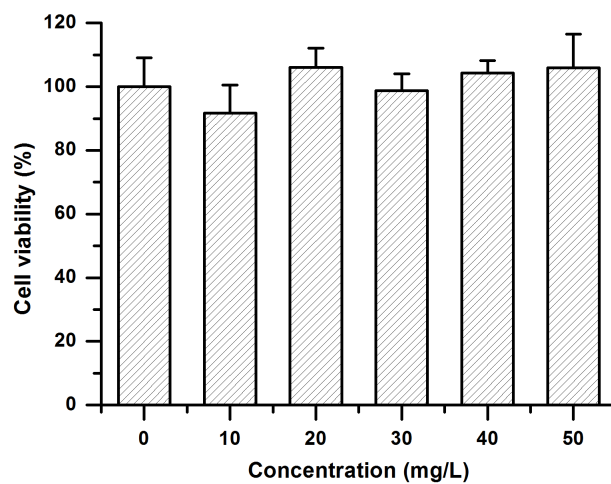

**Figure S3.** Cell toxicity of mZGC. The cytotoxicity was tested by using 3-(4,5-dimethyl-2-thiazolyl)-2,5diphenyl-2H-tetrazolium bromide (MTT, sigma, USA) assay by using human umbilical vein endothelial cells (HUVE cells, ATCC, CRL-1730).

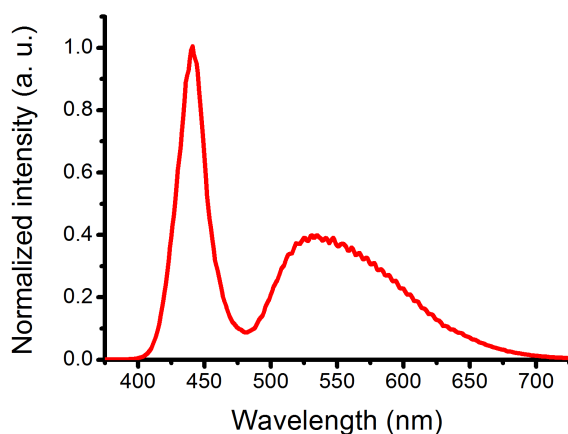

**Figure S4.** Spectrum of the LED torch used for our experiments. Wavelengths longer than 600 nm have better biotissue penetration ability than shorter ones, and result in the charging of mZGC *in vivo*.

**Table S1** Test of the ZGC content in as-synthesized mZGC product.

| MSNs     | mZGC     | Increased mass | ZGC content in mZGC (by weight) |
|----------|----------|----------------|---------------------------------|
| 400.0 mg | 445.7 mg | 45.7 mg        | 10.4%±0.4%                      |
| 400.0 mg | 448.1 mg | 48.1 mg        |                                 |
| 400.0 mg | 445.4 mg | 45.4 mg        |                                 |

**Table S2** Mass loss of mZGC after rinsed in PBS for 48 hours.

| mZGC     | Rinsed and dried mZGC | decreased mass | Mass loss by weight |
|----------|-----------------------|----------------|---------------------|
| 100.0 mg | 99.7 mg               | -1.7 mg        | 0.2 %±1.5%          |
| 100.0 mg | 101.4 mg              | +1.4 mg        |                     |
| 100.0 mg | 100.1 mg              | +0.1 mg        |                     |

[1] P. P. Yang, S. S. Huang, D. Y. Kong, J. Lin, H. G. Fu, *Inorg Chem* 2007, 46, 3203.
